# Supplementary material for: Top-down design of high-performance V-based MBene anode for Li/Na-ion batteries
Source: Royal Society of Chemistry journal article supplement (doi:10.1039/d3cp05743g), 2024-01-01
Supplement: d3cp05743g1.pdf [file d3cp05743g1.pdf]

**Supplementary information:**  
**The top-down design of high-performance V-based MBene anode for the Li/Na-ion batteries**

**Shaohan Li<sup>1</sup>, Weiwei Sun<sup>2,3,\*</sup>, Tingwei Zhu<sup>4</sup>, Siwei Wang<sup>1</sup>, Jing Zhang<sup>4\*</sup>, Jin Yu<sup>1\*</sup>, Wei Zheng<sup>1</sup>, Guobing Ying<sup>1</sup>, Litao Sun<sup>4</sup>, Huayun Geng<sup>5</sup>**

1. School of Materials Science and Engineering, Southeast University, Nanjing, 211189, China
2. Key Laboratory of Quantum Materials and Devices of Ministry of Education, School of Physics, Southeast University, Nanjing, 211189, China
3. Guangxi Key Laboratory of Nuclear Physics and Nuclear Technology, Guilin, 541004, China
4. SEU-FEI Nano-Pico Center, Key Laboratory of MEMS of Ministry of Education, Southeast University, Nanjing, 210096, China
5. National Key Laboratory for Shock Wave and Detonation Physics Research, Institute of Fluid Physics, CAEP, Mianyang, 621900, China

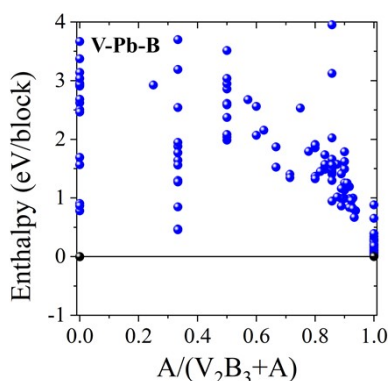

**Fig. S1** The binary variable-composition search for V-Pb-B system with respect to  $V_2B_3$  and A phases.

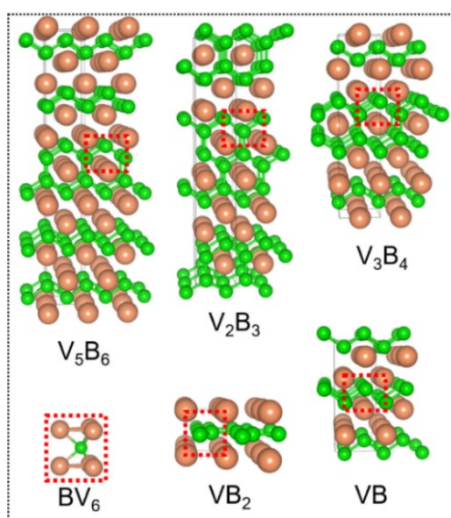

**Fig. S2** Crystal structures of layered  $V_xB_2$  compounds ( $V_5B_6$ ,  $V_2B_3$ ,  $VB_2$ ,  $V_3B_4$ , and  $VB$ ).  $BV_6$  unit is framed in the red dotted box.

Since hex- $V_4PB_6$  has thicker  $M_xB_2$  layers, its out-of-plane lattice constant  $c$  (12.244 Å) is larger than

that of  $\text{Ti}_2\text{InB}_2$  (7.917 Å) and  $\text{Hf}_3\text{InB}_4$  (11.868 Å), while its in-plane parameter  $a$  (3.015 Å) keeps the same level with them (3.077 Å and 3.182 Å), as shown in Table S1. Crossing bands at the Fermi energy ( $E_f$ ) for hex- $\text{V}_4\text{PB}_6$  shown in Fig. S4a represent its metallic feature. The hybridization of  $\text{V}_{3d}$  and  $\text{P}_{3p}$  orbitals located near -1.5 eV and the hybridization of  $\text{V}_{3d}$  and  $\text{B}_{2p}$  orbitals observed in the area lower than -3.4 eV in the density of states (DOS) part of Fig. S4a indicate the V-P bond and stronger V-B bonds. The ELF results in Fig. S4b reveal that there is obvious electron accumulation around P atoms, and significant sharing electron density between adjacent boron atoms means the covalent B-B bonds inside the boron sheet.

**Table S1** Crystallographic structure information of hex- $\text{V}_4\text{PB}_6$  ( $P\bar{6}m2$ , No. 187) and orth- $\text{V}_4\text{PB}_6$  ( $Cmmm$ , No. 65).

| Phases                  | Space group  | Energy (eV/atom)  | Lattice constants (Å) |        |        | Atom sites        |          |                   |                   |
|-------------------------|--------------|-------------------|-----------------------|--------|--------|-------------------|----------|-------------------|-------------------|
|                         |              |                   | $a$                   | $b$    | $c$    | Atom              | Position | Coordinate        |                   |
| $\text{V}_4\text{PB}_6$ | $P\bar{6}m2$ | -8.165            | 3.015                 | 3.015  | 12.244 | V                 | $2h$     | (1/3, 2/3, 0.134) |                   |
|                         |              |                   |                       |        |        |                   |          |                   | (1/3, 2/3, 0.378) |
|                         |              |                   |                       |        |        | P                 | $1a$     | (0, 0, 0)         |                   |
|                         |              |                   |                       |        |        |                   | B        | $2i$              | (2/3, 1/3, 0.253) |
|                         |              |                   |                       |        |        |                   |          | $2g$              | (0, 0, 0.253)     |
| $1b$                    | (0, 0, 0.5)  |                   |                       |        |        |                   |          |                   |                   |
|                         |              |                   |                       |        | $1f$   | (2/3, 1/3, 0.5)   |          |                   |                   |
| $\text{V}_4\text{PB}_6$ | $Cmmm$       | -8.041            | 2.988                 | 20.956 | 3.039  | V                 | $4i$     | (0.5, 0.431, 0)   |                   |
|                         |              |                   |                       |        |        |                   |          | (0.5, 0.188, 0)   |                   |
|                         |              |                   |                       |        |        |                   |          | (0, 0.069, 0)     |                   |
|                         |              |                   |                       |        |        |                   |          | (0, 0.312, 0)     |                   |
|                         |              |                   |                       |        |        | P                 | $2c$     | (0.5, 0, 0.5)     |                   |
| B                       | $4j$         | (0, 0.396, 0.5)   |                       |        |        |                   |          |                   |                   |
|                         |              | (0, 0.146, 0.5)   |                       |        |        |                   |          |                   |                   |
|                         |              | (0, 0.229, 0.5)   |                       |        |        |                   |          |                   |                   |
|                         |              | (0.5, 0.104, 0.5) |                       |        |        |                   |          |                   |                   |
|                         |              | (0.5, 0.354, 0.5) |                       |        |        |                   |          |                   |                   |
|                         |              |                   |                       |        |        | (0.5, 0.271, 0.5) |          |                   |                   |

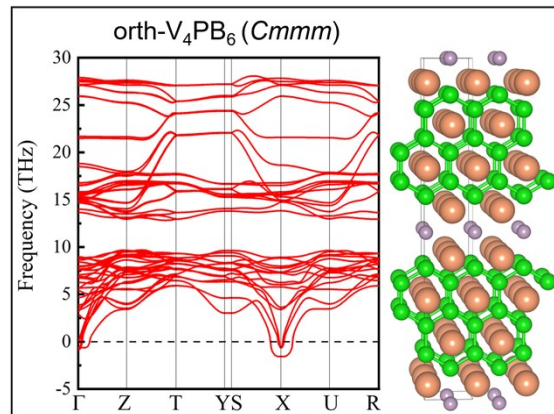

**Fig. S3** The phonon dispersion curve and crystal structure for orth- $\text{V}_4\text{PB}_6$  ( $Cmmm$ ).

**Table S2** Calculated bulk modulus  $B$  (GPa), shear modulus  $G$  (GPa), Young's modulus  $E$  (GPa), Poisson's ratio  $\nu$  and Vickers hardness  $H_V^{Chen}$ ,  $H_V^{Tian}$  (GPa) of hex- $V_2PB_2$  ( $P\bar{6}m2$ ), hex- $V_3PB_4$  ( $P\bar{6}m2$ ), hex- $V_4PB_6$  ( $P\bar{6}m2$ ), binary compound orth- $V_2B_3$  ( $Cmcm$ ), hex- $V_4AlC_3$  ( $P6_3/mmc$ ) and orth- $Cr_4AlB_6$  ( $Cmmm$ ).

| Phases       | $V_2PB_2$ | $V_3PB_4$ | $V_4PB_6$ | $V_2B_3$ | $Cr_4AlB_6$ | $V_4AlC_3$ |
|--------------|-----------|-----------|-----------|----------|-------------|------------|
| $C_{11}$     | 472       | 545       | 583       | 502      | 455         | 456        |
| $C_{12}$     | 108       | 109       | 112       | 146      | 136         | 116        |
| $C_{13}$     | 140       | 139       | 137       | 138      | 138         | 120        |
| $C_{22}$     | -         | -         | -         | 647      | 572         | -          |
| $C_{23}$     | -         | -         | -         | 109      | 139         | -          |
| $C_{33}$     | 459       | 474       | 478       | 663      | 516         | 385        |
| $C_{44}$     | 226       | 232       | 230       | 251      | 191         | 173        |
| $C_{55}$     | -         | -         | -         | 230      | 154         | -          |
| $C_{66}$     | 182       | 232       | 235       | 258      | 192         | 170        |
| $B$          | 242       | 260       | 268       | 287      | 262         | 223        |
| $G$          | 193       | 219       | 222       | 241      | 182         | 165        |
| $E$          | 457       | 513       | 521       | 564      | 443         | 398        |
| $\nu$        | 0.19      | 0.17      | 0.18      | 0.17     | 0.22        | 0.20       |
| $H_V^{Chen}$ | 30.22     | 35.28     | 34.74     | 37.16    | 24.27       | 25.01      |
| $H_V^{Tian}$ | 29.41     | 34.36     | 33.95     | 36.48    | 24.08       | 24.39      |

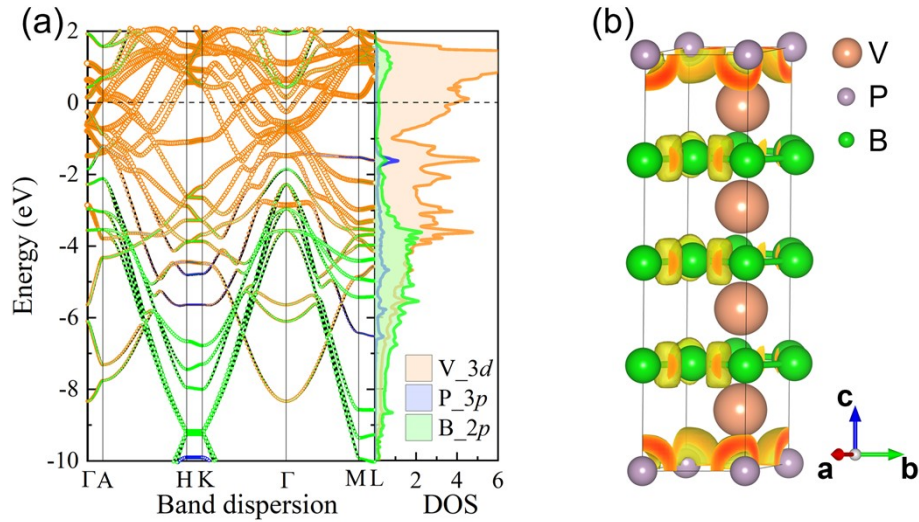

**Fig. S4** (a) The projected band structure and density of states (DOS) for hex- $V_4PB_6$  ( $P\bar{6}m2$ ). The Fermi energy ( $E_f$ ) is indicated by solid line at 0 eV. In the picture, DOS are measured in the unit of states/eV. (b) The three-dimensional electron localization function (ELF) with a value of isosurface 0.7 for hex- $V_4PB_6$  ( $P\bar{6}m2$ ).

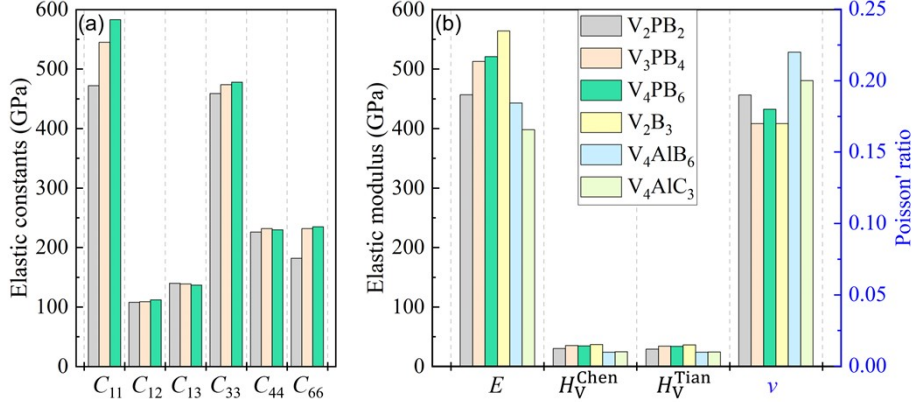

**Fig. S5** (a) Calculated elastic constants for hex-V<sub>2</sub>PB<sub>2</sub> (P $\bar{6}$ m2), hex-V<sub>3</sub>PB<sub>4</sub> (P $\bar{6}$ m2), hex-V<sub>4</sub>PB<sub>6</sub> (P $\bar{6}$ m2). (b) Calculated elastic modulus and Poisson's ratio for hex-V<sub>2</sub>PB<sub>2</sub> (P $\bar{6}$ m2), hex-V<sub>3</sub>PB<sub>4</sub> (P $\bar{6}$ m2), hex-V<sub>4</sub>PB<sub>6</sub> (P $\bar{6}$ m2), binary compound orth-V<sub>2</sub>B<sub>3</sub> (Cmcm), hex-V<sub>4</sub>AlC<sub>3</sub> (P6<sub>3</sub>/mmc) and orth-Cr<sub>4</sub>AlB<sub>6</sub> (Cmmm).

For the M-A, M-B and A-A bonds in MAB phases, their interlayer distance at ground state is  $d_0$ . As the distance  $d$  increases, the energy of compounds becomes higher, and until  $d$  is large enough, the energy no longer changes. Taking M-A bond for example, the relative energy can be obtained from the following equation:

$$E_{relative} = -(E_{MAB} - E_{MB-A})/S \quad (S1)$$

where  $E_{MAB}$  is the total energy of ground-state MAB phase, and  $E_{MB-A}$  is the total energy of MAB phase with an interlayer distance  $d$  between MB and A layers.  $S$  represents the in-plane surface area of the unit cell of the MAB phase. The bonding energy of the M-A bond is the convergent value of relative energy.

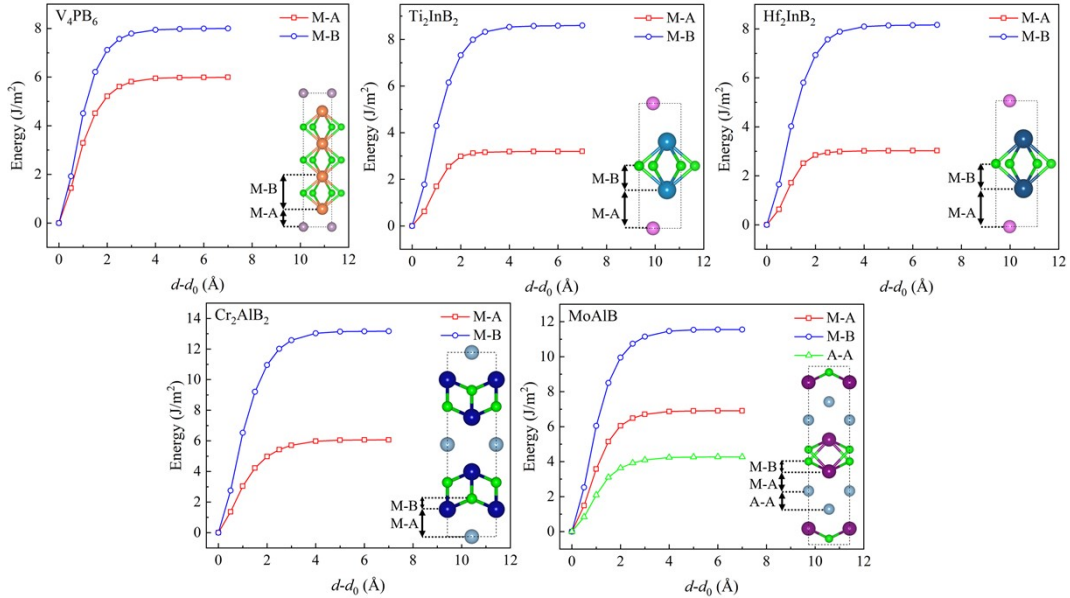

**Fig. S6** Calculated energy varying with  $d-d_0$  for hex-V<sub>4</sub>PB<sub>6</sub> (P $\bar{6}$ m2), hex-Ti<sub>2</sub>InB<sub>2</sub> (P $\bar{6}$ m2), hex-Hf<sub>2</sub>InB<sub>2</sub> (P $\bar{6}$ m2), orth-Cr<sub>2</sub>AlB<sub>2</sub> (Cmmm), and orth-MoAlB (Cmcm).

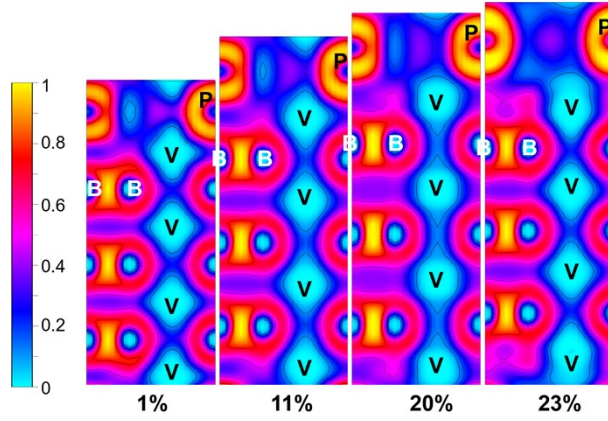

**Fig. S7** The electron localization function (ELF) contour plots along the (110) plane for hex- $V_4PB_6$  ( $P\bar{3}m2$ ) under [001] tensile strains of 1%, 11%, 20% and 23% with an isosurface value 0.85.

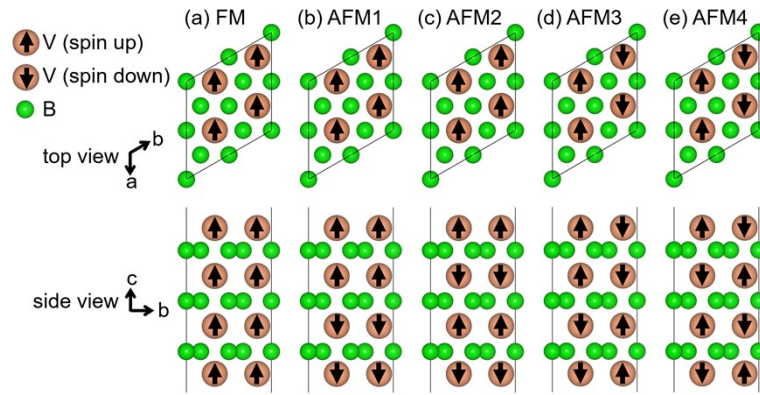

**Fig. S8** Diagram of five magnetic configurations using  $V_4B_6$  as an example: (a) ferromagnetic (FM), and antiferromagnetic (AFM) including (b) AFM1, (c) AFM2, (d) AFM3, (e) AFM4.

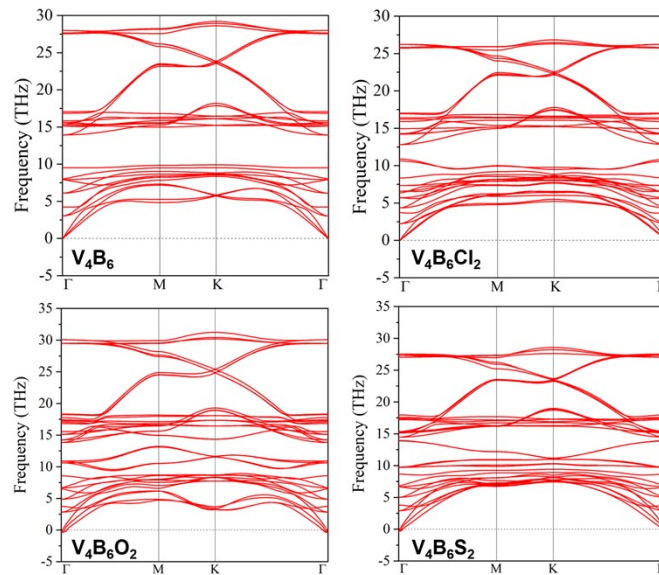

**Fig. S9** Calculated phonon dispersion spectra of 2D  $V_4B_6$  and  $V_4B_6T_2$  (T = Cl, O, and S).

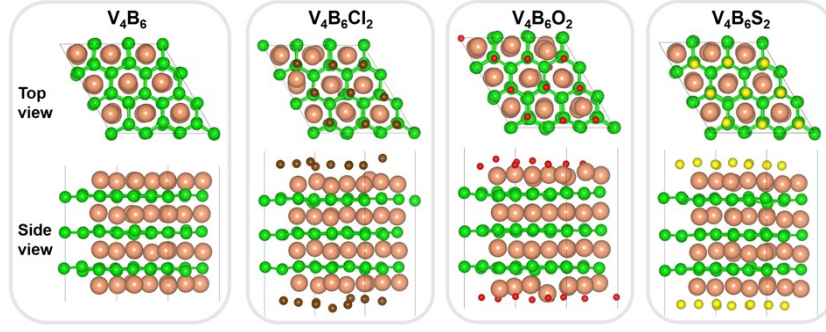

**Fig. S10** Top and side views of equilibrium structures for 2D  $V_4B_6$  and  $V_4B_6T_2$  ( $T = Cl, O,$  and  $S$ ) after undergoing a 5 ps AIMD simulation at 900 K.

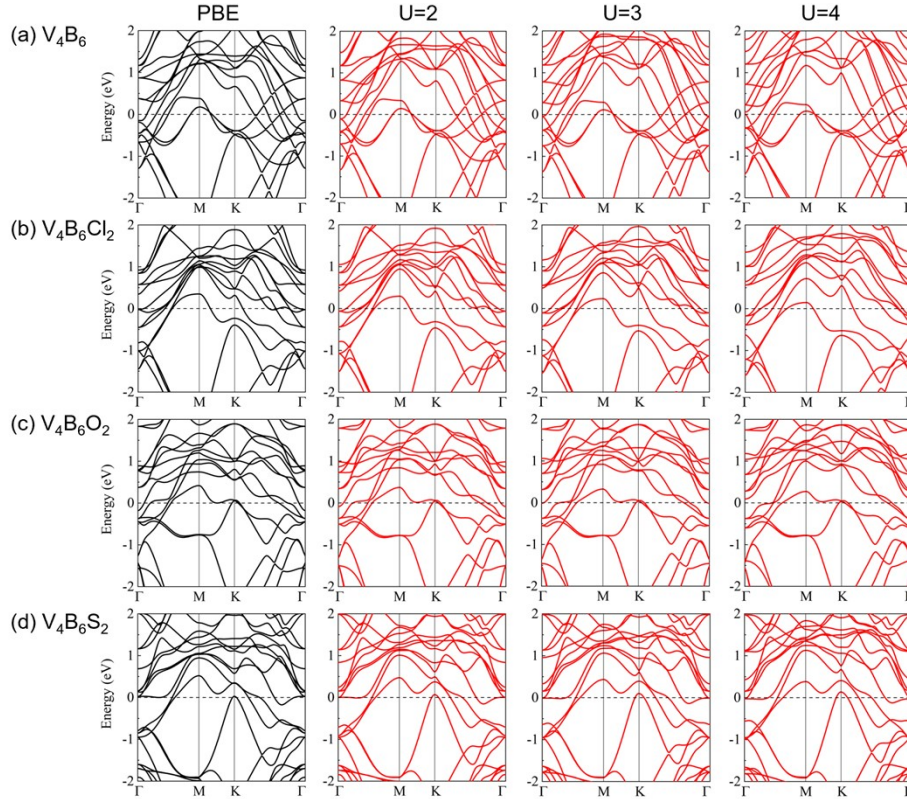

**Fig. S11** Calculated band structures using PBE and PBE+U with  $U = 2$  eV, 3 eV, 4 eV for (a)  $V_4B_6$ , (b)  $V_4B_6Cl_2$ , (c)  $V_4B_6O_2$ , and (d)  $V_4B_6S_2$ .

**Table S3** The space group, lattice constants  $a$ , and elastic constants ( $C_{ij}$ ) of 2D  $V_4B_6$ ,  $V_4B_6Cl_2$ ,  $V_4B_6O_2$ , and  $V_4B_6S_2$ .

|                      | $V_4B_6$ | $V_4B_6Cl_2$ | $V_4B_6O_2$  | $V_4B_6S_2$  |
|----------------------|----------|--------------|--------------|--------------|
| Space group          | $P6/mmm$ | $P\bar{6}m2$ | $P\bar{3}m1$ | $P\bar{6}m2$ |
| $a$ ( $\text{\AA}$ ) | 2.976    | 3.030        | 2.936        | 3.011        |
| $C_{11}$ (N/m)       | 640      | 650          | 733          | 721          |
| $C_{12}$ (N/m)       | 82       | 96           | 128          | 116          |
| $C_{66}$ (N/m)       | 279      | 277          | 303          | 302          |

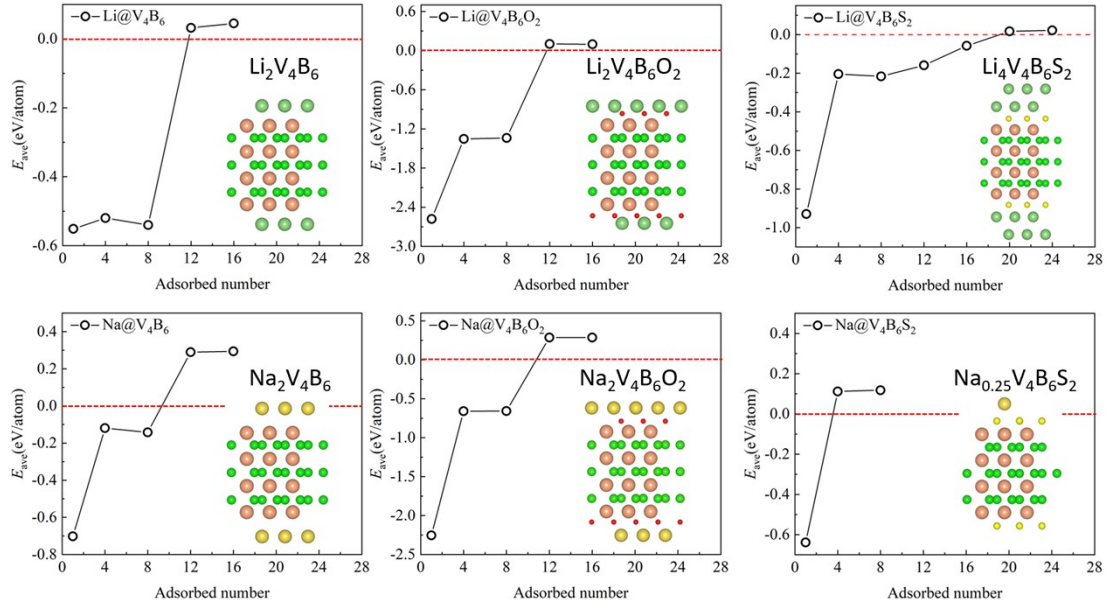

**Fig. S12** The average adsorption energy ( $E_{ave}$ ) with increasing adsorbed Li/Na layers on 2D  $V_4B_6$ ,  $V_4B_6Cl_2$ ,  $V_4B_6O_2$  and  $V_4B_6S_2$  monolayers. The inset is the side view of structures of  $Li_2V_4B_6$ ,  $Li_{0.25}V_4B_6Cl_2$ ,  $Li_2V_4B_6O_2$ ,  $Na_2V_4B_6$ ,  $Na_2V_4B_6O_2$  and  $Na_{0.25}V_4B_6S_2$  with the largest number of Li/Na layer.

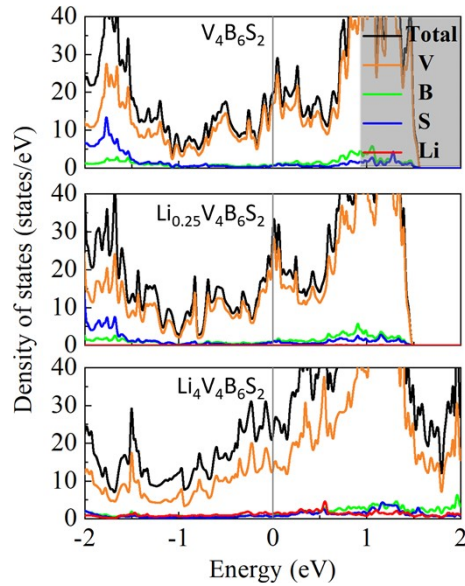

**Fig. S13** The elementary density of states (DOS) of the  $V_4B_6S_2$ ,  $Li_{0.25}V_4B_6S_2$ , and  $Li_4V_4B_6S_2$ .

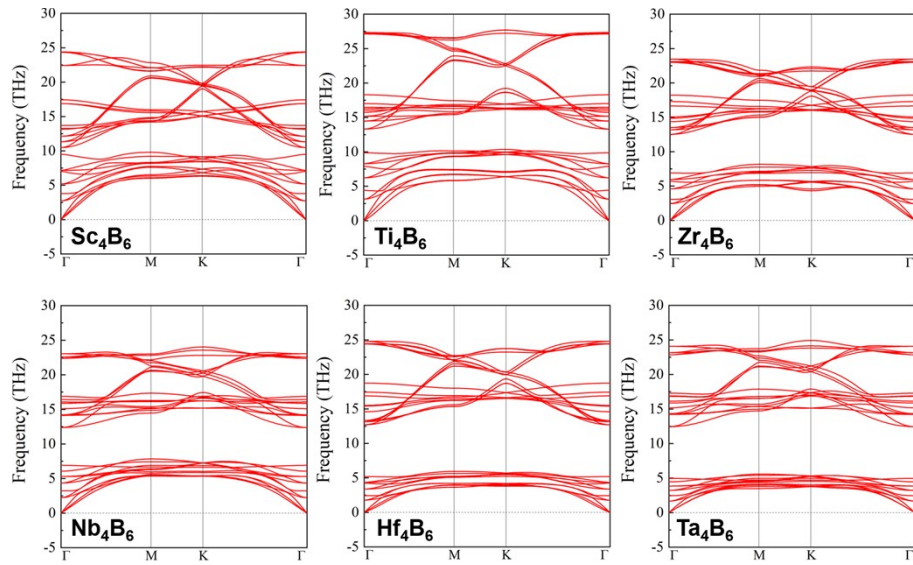

Fig. S14 Calculated phonon dispersion spectra of 2D h- $M_4B_6$  ( $M = \text{Sc}, \text{Ti}, \text{Zr}, \text{Nb}, \text{Hf}, \text{and Ta}$ ).

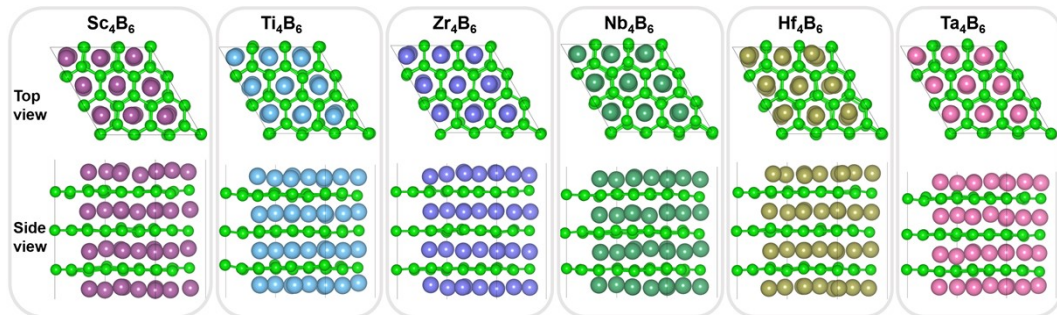

Fig. S15 Top and side views of equilibrium structures for 2D h- $M_4B_6$  ( $M = \text{Sc}, \text{Ti}, \text{Zr}, \text{Nb}, \text{Hf}, \text{and Ta}$ ) after undergoing a 5 ps AIMD simulation at 900 K.
